# Supplementary material for: The DNA-damage signature in Saccharomyces cerevisiae is associated with single-strand breaks in DNA
Source: PubMed Central journal article supplement (PMC1764021; doi:10.1186/1471-2164-7-313), 2006-12-12
Supplement: 1471-2164-7-313-S1.pdf [file 1471-2164-7-313-S1.pdf]

R. Fry *et al.* Supplemental Table 1

Sector 1

| Category (Gene Ontology)                                                         | p-value   | Genes In Category from Cluster                            | k  | f   | sector |
|----------------------------------------------------------------------------------|-----------|-----------------------------------------------------------|----|-----|--------|
| response to stress [GO:0006950]                                                  | 3.72E-05  | HSP26 YCL033C DUN1 RAD51 PRE3 ASF1<br>MSN4 AHP1 MSN2 CRS5 | 10 | 199 | I      |
| DNA replication, priming [GO:0006269]                                            | 3.79E-05  | RFA1 POL1 RFA2                                            | 3  | 7   | I      |
| double-strand break repair [GO:0006302]                                          | 0.0002503 | RFA1 RAD51 POL1 RFA2                                      | 4  | 30  | I      |
| DNA recombination [GO:0006310]                                                   | 0.001153  | RFA1 RAD51 MSC1 POL1 RFA2                                 | 5  | 76  | I      |
| response to biotic stimulus [GO:0009607]                                         | 0.002572  | YCL033C DUN1 RAD51 ASF1 AHP1                              | 5  | 91  | I      |
| DNA replication [GO:0006260]                                                     | 0.002572  | RFA1 RNR3 RNR2 POL1 RFA2                                  | 5  | 91  | I      |
| S phase of mitotic cell cycle [GO:0000084]                                       | 0.002828  | RFA1 RNR3 RNR2 POL1 RFA2                                  | 5  | 93  | I      |
| DNA strand elongation [GO:0006271]                                               | 0.003028  | RFA1 POL1 RFA2                                            | 3  | 28  | I      |
| double-strand break repair via synthesis-dependent strand annealing [GO:0045003] | 0.004655  | RAD51 POL1                                                | 2  | 10  | I      |
| post-replication repair [GO:0006301]                                             | 0.004655  | RFA1 RFA2                                                 | 2  | 10  | I      |
| DNA unwinding [GO:0006268]                                                       | 0.005651  | RFA1 RFA2                                                 | 2  | 11  | I      |
| double-strand break repair via single-strand annealing [GO:0045002]              | 0.006736  | RAD51 POL1                                                | 2  | 12  | I      |
| response to DNA damage [GO:0006974]                                              | 0.008349  | DUN1 RAD51 ASF1                                           | 3  | 40  | I      |

Sector 3

| Category (Gene Ontology)                                                       | p-value   | Genes In Category from Cluster                                                  | k  | f    | sector |
|--------------------------------------------------------------------------------|-----------|---------------------------------------------------------------------------------|----|------|--------|
| chromatin assembly/disassembly [GO:0006333]                                    | 2.00E-06  | HTA2 HHT1 HTB1 HTA1 HHF2                                                        | 5  | 23   | III    |
| lysine biosynthesis [GO:0009085]                                               | 6.73E-05  | LYS21 LYS4 LYS12                                                                | 3  | 9    | III    |
| lysine metabolism [GO:0006553]                                                 | 6.73E-05  | LYS21 LYS4 LYS12                                                                | 3  | 9    | III    |
| cell growth and/or maintenance [GO:0008151]                                    | 0.0003162 | HTA2 HHT1 CHS2 PHO3 PHO5 YMC2 DUT1<br>CTP1 CHA1 LYS21 FAP7 RPL41A RRP1 TRM1     | 48 | 3657 | III    |
| aspartate family amino acid biosynthesis [GO:0009067]                          | 0.0004276 | LYS21 LYS4 LYS12                                                                | 3  | 16   | III    |
| amino acid biosynthesis [GO:0008652]                                           | 0.001524  | LYS21 LYS4 TRP2 BAT1 LYS12                                                      | 5  | 89   | III    |
| amine biosynthesis [GO:0009309]                                                | 0.002036  | LYS21 LYS4 TRP2 BAT1 LYS12                                                      | 5  | 95   | III    |
| amino acid metabolism [GO:0006520]                                             | 0.002074  | CHA1 LYS21 LYS4 TRP2 BAT1 LYS12                                                 | 6  | 140  | III    |
| DNA packaging [GO:0006323]                                                     | 0.00215   | HTA2 HHT1 HTB1 HTA1 FKH1 HHF2                                                   | 6  | 141  | III    |
| establishment and/or maintenance of chromatin architecture [GO:0006325]        | 0.00215   | HTA2 HHT1 HTB1 HTA1 FKH1 HHF2                                                   | 6  | 141  | III    |
| lysine biosynthesis, aminoadipic pathway [GO:0019878]                          | 0.002432  | LYS21 LYS4                                                                      | 2  | 8    | III    |
| amino acid and derivative metabolism [GO:0006519]                              | 0.002839  | CHA1 LYS21 LYS4 TRP2 BAT1 LYS12                                                 | 6  | 149  | III    |
| amine metabolism [GO:0009308]                                                  | 0.003035  | CHA1 LYS21 LYS4 TRP2 BAT1 LYS12                                                 | 6  | 151  | III    |
| lariat formation, 5'-splice site cleavage [GO:0006372]                         | 0.003108  | PRP28 PRP43                                                                     | 2  | 9    | III    |
| chromosome organization and biogenesis (sensu Eukarya) [GO:0007001]            | 0.004428  | HTA2 HHT1 HTB1 HTA1 FKH1 HHF2                                                   | 6  | 163  | III    |
| ribosomal large subunit biogenesis [GO:0042273]                                | 0.00657   | NSA2 TIF6                                                                       | 2  | 13   | III    |
| aspartate family amino acid metabolism [GO:0009066]                            | 0.006869  | LYS21 LYS4 LYS12                                                                | 3  | 41   | III    |
| biosynthesis [GO:0009058]                                                      | 0.007829  | LYS21 RPL41A LYS4 GPI17 RPL27B PMI40 TRP2<br>TSC11 RPL22B RPL28 BAT1 LYS12 RPI1 | 14 | 731  | III    |
| nucleotide catabolism [GO:0009166]                                             | 0.009574  | DUT1                                                                            | 1  | 1    | III    |
| pyrimidine nucleotide catabolism [GO:0006244]                                  | 0.009574  | DUT1                                                                            | 1  | 1    | III    |
| deoxyribonucleoside triphosphate catabolism [GO:0009204]                       | 0.009574  | DUT1                                                                            | 1  | 1    | III    |
| nucleoside triphosphate catabolism [GO:0009143]                                | 0.009574  | DUT1                                                                            | 1  | 1    | III    |
| pyrimidine nucleoside triphosphate catabolism [GO:0009149]                     | 0.009574  | DUT1                                                                            | 1  | 1    | III    |
| cytosine transport [GO:0015856]                                                | 0.009574  | FCY2                                                                            | 1  | 1    | III    |
| purine transport [GO:0006863]                                                  | 0.009574  | FCY2                                                                            | 1  | 1    | III    |
| unfolded protein response, target gene transcriptional activation [GO:0006990] | 0.009574  | HAC1                                                                            | 1  | 1    | III    |
| deoxyribonucleotide catabolism [GO:0009264]                                    | 0.009574  | DUT1                                                                            | 1  | 1    | III    |
| pyrimidine deoxyribonucleotide catabolism [GO:0009223]                         | 0.009574  | DUT1                                                                            | 1  | 1    | III    |

|                                                                     |          |      |   |   |     |
|---------------------------------------------------------------------|----------|------|---|---|-----|
| pyrimidine deoxyribonucleoside triphosphate catabolism [GO:0009213] | 0.009574 | DUT1 | 1 | 1 | III |
| citrate transport [GO:0015746]                                      | 0.009574 | CTP1 | 1 | 1 | III |
| mitochondrial citrate transport [GO:0006843]                        | 0.009574 | CTP1 | 1 | 1 | III |

#### Sector 2

| Category (Gene Ontology)                                              | p-value  | Genes In Category from Cluster | k | f  |    |
|-----------------------------------------------------------------------|----------|--------------------------------|---|----|----|
| mutagenesis [GO:0006280]                                              | 0.001277 | POL30 CDC8                     | 2 | 7  | II |
| post-replication repair [GO:0006301]                                  | 0.002695 | POL30 RFA3                     | 2 | 10 | II |
| DNA replication [GO:0006260]                                          | 0.005757 | POL30 RNR4 RFA3 CDC8           | 4 | 91 | II |
| S phase of mitotic cell cycle [GO:0000084]                            | 0.006216 | POL30 RNR4 RFA3 CDC8           | 4 | 93 | II |
| dTTP metabolism [GO:0046075]                                          | 0.007978 | CDC8                           | 1 | 1  | II |
| pyrimidine deoxyribonucleoside triphosphate biosynthesis [GO:0009212] | 0.007978 | CDC8                           | 1 | 1  | II |
| deoxyribonucleoside triphosphate biosynthesis [GO:0009202]            | 0.007978 | CDC8                           | 1 | 1  | II |
| pyrimidine nucleoside triphosphate biosynthesis [GO:0009148]          | 0.007978 | CDC8                           | 1 | 1  | II |
| dTDP biosynthesis [GO:0006233]                                        | 0.007978 | CDC8                           | 1 | 1  | II |
| dTDP metabolism [GO:0046072]                                          | 0.007978 | CDC8                           | 1 | 1  | II |
| pyrimidine deoxyribonucleoside diphosphate metabolism [GO:0009196]    | 0.007978 | CDC8                           | 1 | 1  | II |
| deoxyribonucleoside diphosphate metabolism [GO:0009186]               | 0.007978 | CDC8                           | 1 | 1  | II |
| nucleoside diphosphate metabolism [GO:0009132]                        | 0.007978 | CDC8                           | 1 | 1  | II |
| pyrimidine nucleoside diphosphate metabolism [GO:0009138]             | 0.007978 | CDC8                           | 1 | 1  | II |
| pyrimidine deoxyribonucleoside diphosphate biosynthesis [GO:0009197]  | 0.007978 | CDC8                           | 1 | 1  | II |
| deoxyribonucleoside diphosphate biosynthesis [GO:0009189]             | 0.007978 | CDC8                           | 1 | 1  | II |
| nucleoside diphosphate biosynthesis [GO:0009133]                      | 0.007978 | CDC8                           | 1 | 1  | II |
| pyrimidine nucleoside diphosphate biosynthesis [GO:0009139]           | 0.007978 | CDC8                           | 1 | 1  | II |
| dTTP biosynthesis [GO:0006235]                                        | 0.007978 | CDC8                           | 1 | 1  | II |

#### Sector 4

| Category                                                            | p-value   | Genes In Category from Cluster  | k | f   |    |
|---------------------------------------------------------------------|-----------|---------------------------------|---|-----|----|
| chromatin assembly/disassembly [GO:0006333]                         | 0.0007564 | HTB2 HHT1 HHT2                  | 3 | 23  | IV |
| response to osmotic stress [GO:0006970]                             | 0.005358  | MSN1 LAS17 IQG1                 | 3 | 45  | IV |
| response to abiotic stimulus [GO:0009628]                           | 0.005677  | STE6 CDC42 MSN1 LAS17 IQG1      | 5 | 145 | IV |
| regulation of CDK activity [GO:0000079]                             | 0.00613   | CLB1 CLN2                       | 2 | 15  | IV |
| budding [GO:0007114]                                                | 0.00747   | BUD4 CDC42 MUB1 LAS17           | 4 | 98  | IV |
| sucrose catabolism [GO:0005987]                                     | 0.007978  | SUC2                            | 1 | 1   | IV |
| sucrose metabolism [GO:0005985]                                     | 0.007978  | SUC2                            | 1 | 1   | IV |
| nucleobase catabolism [GO:0046113]                                  | 0.007978  | AAH1                            | 1 | 1   | IV |
| arginine catabolism to ornithine [GO:0019547]                       | 0.007978  | CAR1                            | 1 | 1   | IV |
| purine base catabolism [GO:0006145]                                 | 0.007978  | AAH1                            | 1 | 1   | IV |
| meiotic G2/M1 transition [GO:0008315]                               | 0.007978  | CLB1                            | 1 | 1   | IV |
| regulation of budding [GO:0007116]                                  | 0.007978  | MUB1                            | 1 | 1   | IV |
| a-factor export [GO:0007325]                                        | 0.007978  | STE6                            | 1 | 1   | IV |
| adenine catabolism [GO:0006146]                                     | 0.007978  | AAH1                            | 1 | 1   | IV |
| chromosome organization and biogenesis (sensu Eukarya) [GO:0007001] | 0.009227  | HTB2 HEK2 HHT1 HHT2 HTZ1        | 5 | 163 | IV |
| response to external stimulus [GO:0009605]                          | 0.009613  | HEK2 STE6 CDC42 MSN1 LAS17 IQG1 | 6 | 231 | IV |
