# Supplementary material for: The DNA-damage signature in Saccharomyces cerevisiae is associated with single-strand breaks in DNA
Source: PubMed Central journal article supplement (PMC1764021; doi:10.1186/1471-2164-7-313), 2006-12-12
Supplement: 1471-2164-7-313-S2.pdf [file 1471-2164-7-313-S2.pdf]

R. Fry *et al.* Supplemental Table 2

A, GO Biological Process (Single-strand break association)

| Category                                                                         | p-value   | In Category from Cluster                     | k | f   |
|----------------------------------------------------------------------------------|-----------|----------------------------------------------|---|-----|
| response to stress [GO:0006950]                                                  | 8.58E-07  | HSP26 YCL033C DUN1 RAD51 HYR1 ASF1 AHP1 CRS5 | 8 | 199 |
| response to biotic stimulus [GO:0009607]                                         | 1.45E-06  | YCL033C DUN1 RAD51 HYR1 ASF1 AHP1            | 6 | 91  |
| response to external stimulus [GO:0009605]                                       | 2.65E-06  | YCL033C DUN1 RAD51 HYR1 ASF1 AHP1 CRS5 PDR10 | 8 | 231 |
| cell communication [GO:0007154]                                                  | 5.39E-05  | YCL033C DUN1 RAD51 HYR1 ASF1 AHP1 CRS5 PDR10 | 8 | 348 |
| double-strand break repair [GO:0006302]                                          | 0.000239  | RAD51 POL1 RFA2                              | 3 | 30  |
| response to oxidative stress [GO:0006979]                                        | 0.0002904 | YCL033C HYR1 AHP1                            | 3 | 32  |
| DNA replication, priming [GO:0006269]                                            | 0.0003432 | POL1 RFA2                                    | 2 | 7   |
| oxygen and reactive oxygen species metabolism [GO:0006800]                       | 0.00038   | YCL033C HYR1 AHP1                            | 3 | 35  |
| response to DNA damage [GO:0006974]                                              | 0.0005658 | DUN1 RAD51 ASF1                              | 3 | 40  |
| double-strand break repair via synthesis-dependent strand annealing [GO:0045003] | 0.0007298 | RAD51 POL1                                   | 2 | 10  |
| double-strand break repair via single-strand annealing [GO:0045002]              | 0.001065  | RAD51 POL1                                   | 2 | 12  |
| DNA repair [GO:0006281]                                                          | 0.001216  | RAD51 CAC2 POL1 RFA2                         | 4 | 116 |
| recombinational repair [GO:0000725]                                              | 0.001917  | RAD51 POL1                                   | 2 | 16  |
| double-strand break repair via homologous recombination [GO:0000724]             | 0.001917  | RAD51 POL1                                   | 2 | 16  |
| non-recombinational repair [GO:0000726]                                          | 0.003004  | RAD51 POL1                                   | 2 | 20  |
| DNA recombination [GO:0006310]                                                   | 0.003646  | RAD51 POL1 RFA2                              | 3 | 76  |
| induction of programmed cell death [GO:0012502]                                  | 0.004149  | ASF1                                         | 1 | 1   |
| induction of apoptosis [GO:0006917]                                              | 0.004149  | ASF1                                         | 1 | 1   |
| induction of apoptosis by intracellular signals [GO:0008629]                     | 0.004149  | ASF1                                         | 1 | 1   |
| induction of apoptosis by DNA damage [GO:0008630]                                | 0.004149  | ASF1                                         | 1 | 1   |
| strand invasion [GO:0042148]                                                     | 0.004149  | RAD51                                        | 1 | 1   |
| mitotic recombination [GO:0006312]                                               | 0.004683  | RAD51 POL1                                   | 2 | 25  |
| DNA strand elongation [GO:0006271]                                               | 0.005855  | POL1 RFA2                                    | 2 | 28  |
| DNA replication [GO:0006260]                                                     | 0.006047  | RNR2 POL1 RFA2                               | 3 | 91  |
| S phase of mitotic cell cycle [GO:0000084]                                       | 0.006424  | RNR2 POL1 RFA2                               | 3 | 93  |
| meiotic joint molecule formation [GO:0000709]                                    | 0.008281  | RAD51                                        | 1 | 2   |
| response to chemical substance [GO:0042221]                                      | 0.009563  | CRS5 PDR10                                   | 2 | 36  |

B, GO Biological Process (Double-strand break association)

| Category                                               | p-value  | In Category from Cluster | k | f   |
|--------------------------------------------------------|----------|--------------------------|---|-----|
| regulation of cell cycle [GO:0000074]                  | 0.00128  | SDA1 FKH1 FAR1 CLN2      | 4 | 105 |
| purine base catabolism [GO:0006145]                    | 0.004627 | AAH1                     | 1 | 1   |
| nucleobase catabolism [GO:0046113]                     | 0.004627 | AAH1                     | 1 | 1   |
| sucrose metabolism [GO:0005985]                        | 0.004627 | SUC2                     | 1 | 1   |
| sucrose catabolism [GO:0005987]                        | 0.004627 | SUC2                     | 1 | 1   |
| adenine catabolism [GO:0006146]                        | 0.004627 | AAH1                     | 1 | 1   |
| start control point of mitotic cell cycle [GO:0007089] | 0.009234 | SDA1                     | 1 | 2   |
| adenine metabolism [GO:0046083]                        | 0.009234 | AAH1                     | 1 | 2   |
