# Supplementary material for: The DNA-damage signature in Saccharomyces cerevisiae is associated with single-strand breaks in DNA
Source: PubMed Central journal article supplement (PMC1764021; doi:10.1186/1471-2164-7-313), 2006-12-12

**Fry et al. Additional File 3:  
Cytotoxicity dose-response curves for *S. cerevisiae* strain DBY747 treated with enediynes**

- Data represent mean of duplicate samples
- Data were fit to an equation for exponential decay
- 20-25% cytotoxicity window indicated with gray box
- Calculated values for neocarzinostatin:  
LD<sub>20</sub> = 3.3 nM  
LD<sub>25</sub> = 4.2 nM
- Calculated values for calicheamicin:  
LD<sub>20</sub> = 1 nM  
LD<sub>25</sub> = 1.4 nM

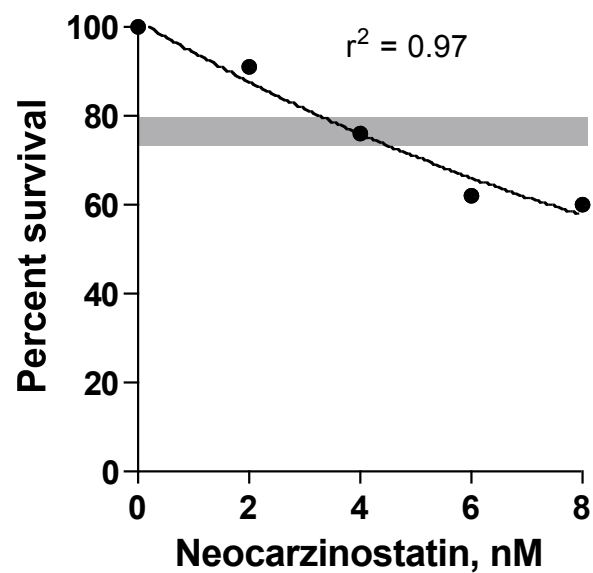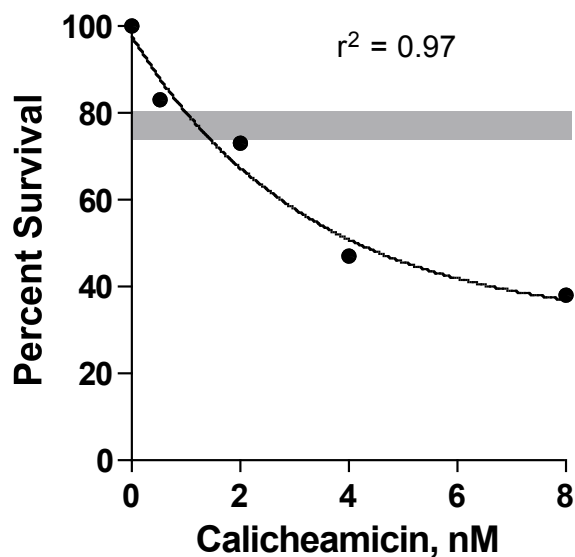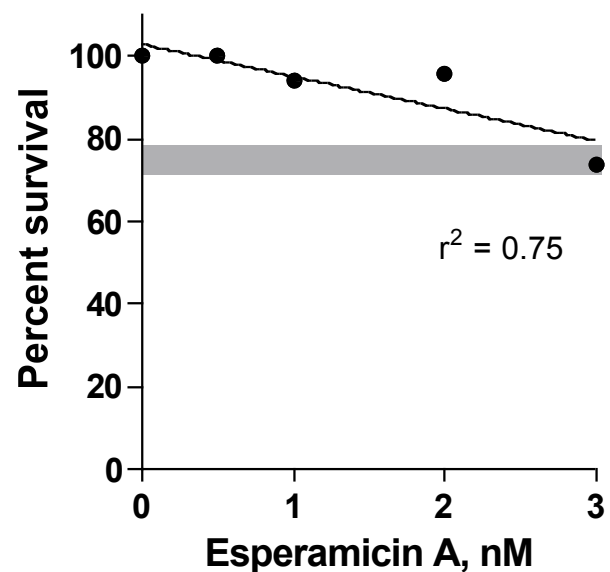

Supplement: 1471-2164-7-313-S3.pdf [file 1471-2164-7-313-S3.pdf]
